# Supplementary material for: Sex Differences in Tuberculosis Burden and Notifications in Low- and Middle-Income Countries: A Systematic Review and Meta-analysis
Source: PLOS journal article supplement (doi:10.1371/journal.pmed.1002119), 2016-09-06
Supplement: S5 (10.1371/journal.pmed.1002119.s005) [file journal.pmed.1002119.s005]

**S1 Figure: Distribution of overall risk of bias by response to each assessment criteria** Labels within each bar indicate the number of studies with each classification of overall risk of bias.

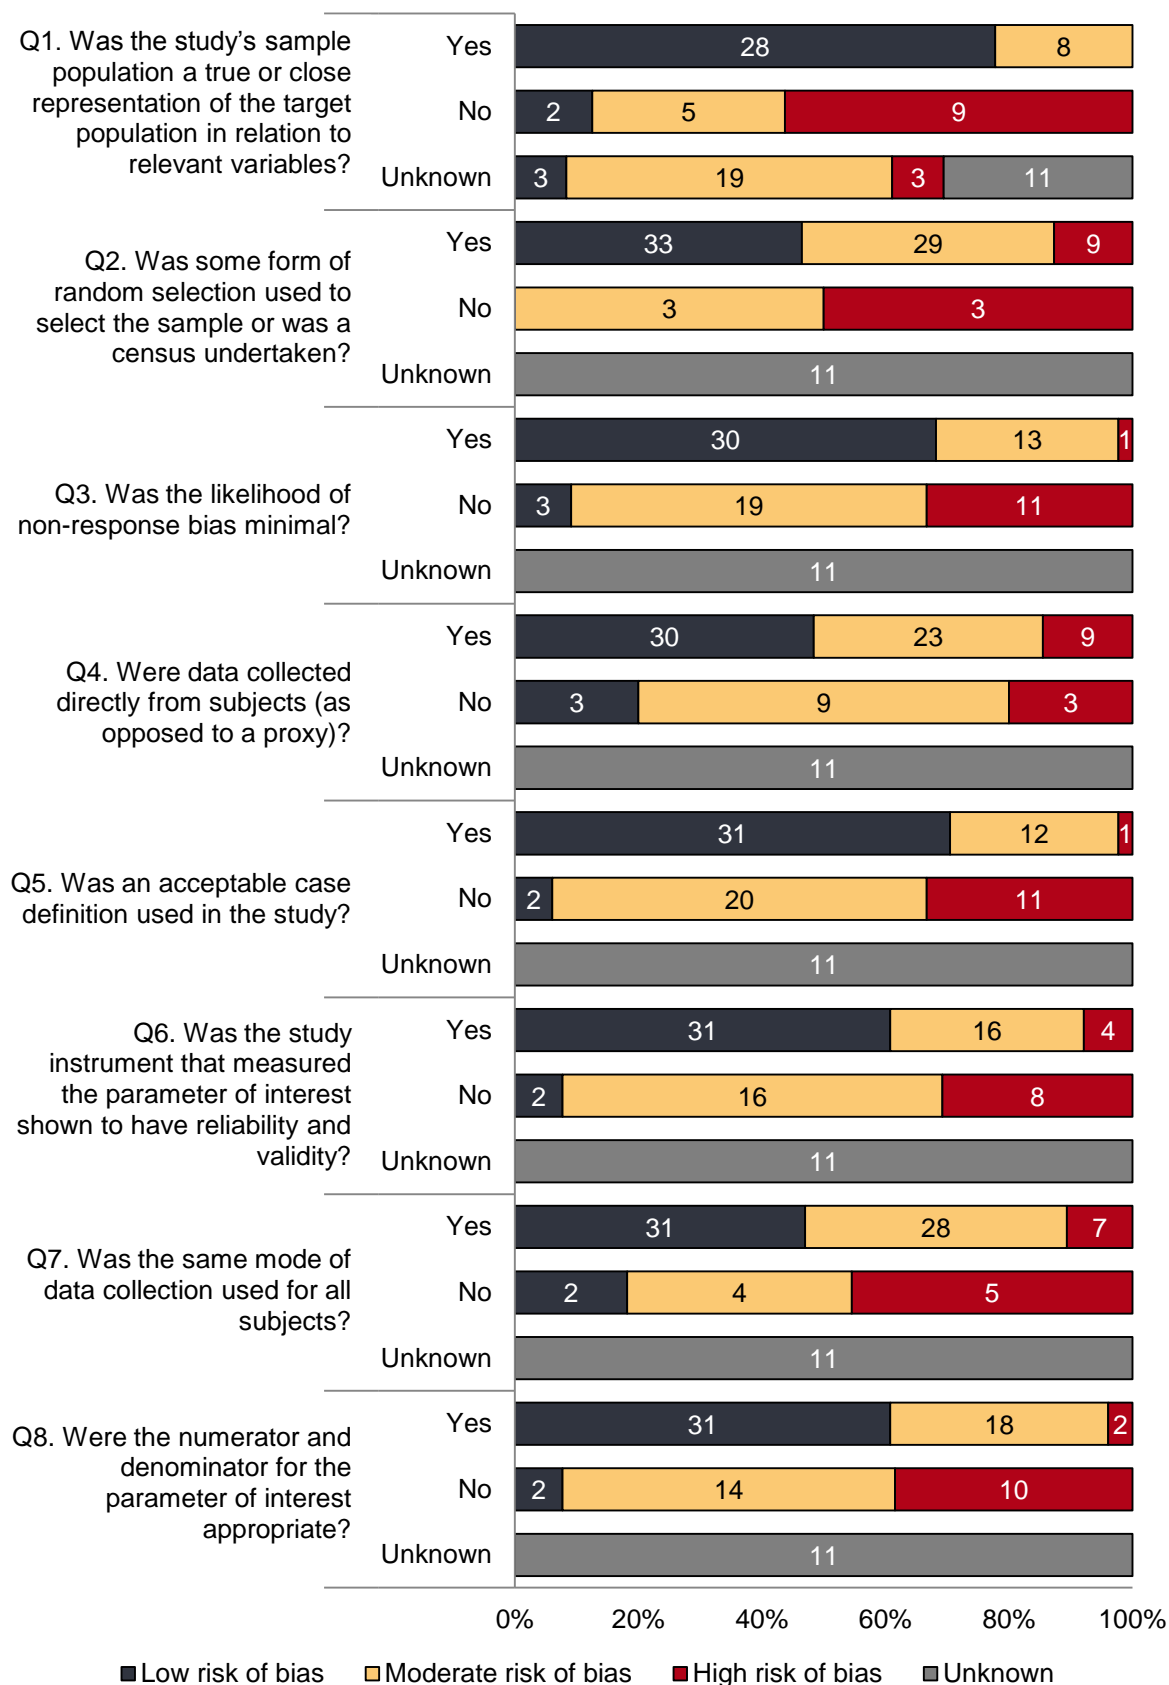

**Sex differences in tuberculosis burden and notifications in low- and middle-income countries: a systematic review and meta-analysis**

Katherine C. Horton, Peter MacPherson, Rein M.G.J. Houben, Richard G. White, Elizabeth L. Corbett
